# Supplementary material
Source: PubMed Central journal article supplement (PMC11029588)
Supplement: 262_2015_1691_MOESM1_ESM.pdf [file 262_2015_1691_MOESM1_ESM.pdf]

| <b>Antibody</b>   | <b>Provider</b> | <b>Concentration used</b> | <b>Clone</b> |
|-------------------|-----------------|---------------------------|--------------|
| <b>gp100</b>      | DBS             | 1/25                      | HMB45        |
| <b>Melan-A</b>    | Dako            | 1/25                      | A103         |
| <b>Tyrosinase</b> | Novocastra      | 4 µg/mL                   | T311         |
| <b>pan-MAGEs</b>  | Santa Cruz      | 8 µg/mL                   | -            |
| <b>NY-ESO-1</b>   | Santa Cruz      | 10 µg/mL                  | E978         |
| <b>CD8</b>        | Dako            | 5 µg/mL                   | C8/144B      |
| <b>CD4</b>        | Dako            | 2.5 µg/mL                 | MT310        |
| <b>Foxp3</b>      | ebioscience     | 5 µg/mL                   | 236A/E7      |
| <b>IL-10</b>      | Diaclone        | 2 µg/mL                   | B-S10        |
| <b>TGF-β</b>      | Serotec         | 2 µg/mL                   | TB21         |
| <b>IFN-γ</b>      | Santa Cruz      | 20 µg/mL                  | G23          |
| <b>TNF-α</b>      | DBS             | 1/50                      | 28401.111    |
| <b>IDO1</b>       | Serotec         | 1/100                     | 10,1         |
| <b>STAT3</b>      | Lifespan        | 1/100                     | -            |
| <b>PD-1</b>       | ebioscience     | 5 µg/mL                   | J105         |
| <b>PD-L1</b>      | ebioscience     | 5 µg/mL                   | MIH1         |
| <b>CTLA-4</b>     | ebioscience     | 5 µg/mL                   | 14D3         |

**Supplementary Table 1.** Monoclonal antibodies used to assess the expression of predictive markers: T-cell infiltrate (CD4 and CD8), pro-inflammatory cytokines (IFN-γ and TNF-α), transcription factor STAT3, immunosuppressive cytokines (IL-10 and TGF-β), IDO1 and Foxp3, negative checkpoint molecules (PD-1, PD-L1 and CTLA-4) and melanoma-associated antigens (Melan-A, gp100, tyrosinase, NY-ESO-1 and pan-MAGEs)

|            |         |                                      |
|------------|---------|--------------------------------------|
| BRAF V600  | forward | AGG TGA TTT TGG TCT AGC TAC AGT      |
|            | reverse | ATG GAT CCA GAC AAC TGT TCA AAC      |
| BRAF V600E | forward | AGG TGA TTT TGG TCT AGC TAC AGA      |
|            | reverse | ATG GAT CCA GAC AAC TGT TCA AAC      |
| BRAF 15F   | forward | 5'-TCA TAA TGC TTG CTC TGA TAG GA-3' |
| BRAF 15R   | reverse | 5'-GGC CAA AAA TTT AAT CAG TGG A-3'  |
| NRAS 2F    | forward | 5'-CCC CCA GGA TTC TTA CAG AA-3'     |
| NRAS 2R    | reverse | 5'-ATA CAC AGA GGA AGC CTT CG-3'     |

**Supplementary Table 2.** Primers used for amplification and sequencing to detect BRAF and NRAS mutations

| Markers        | Overall clinical response          |                       |         | Local cutaneous response           |                       |         |
|----------------|------------------------------------|-----------------------|---------|------------------------------------|-----------------------|---------|
|                | RC or RP or SD<br>(Mean [Min-Max]) | P<br>(Mean [Min-Max]) | p-value | RC or RP or SD<br>(Mean [Min-Max]) | P<br>(Mean [Min-Max]) | p-value |
| CD8            | 0.8[0-1]                           | 1[0-2]                | 0.76    | 1[0-2]                             | 0.7[0-2]              | 0.498   |
| CD4            | 1.6[1-2]                           | 1.83[1-3]             | 0.68    | 1.88[1-3]                          | 1.33[1-2]             | 0.252   |
| Foxp3          | 0.4[0-1]                           | 0.167[0-1]            | 0.48    | 0.25[0-1]                          | 0.33[0-1]             | 0.895   |
| GP100          | 1.8[0-3]                           | 2.5[0-4]              | 0.40    | 2.25[0-4]                          | 2[0-3]                | 0.833   |
| Melan-A        | 2.8[1-4]                           | 2[0-4]                | 0.51    | 2.375[0-4]                         | 2.33[0-4]             | 1       |
| Tyrosinase     | 1.8[0-4]                           | 1[0-4]                | 1.00    | 1.125[0-4]                         | 2[1-4]                | 0.229   |
| MAGEs          | 1.4[0-4]                           | 1.33[0-4]             | 1.00    | 1.375[0-4]                         | 1.33[0-4]             | 0.515   |
| NY-ESO-1       | 0.8[0-4]                           | 0.5[0-1]              | 0.59    | 0.75[0-4]                          | 0.33[0-1]             | 0.904   |
| IL-10          | 1[0-4]                             | 0.33[0-2]             | 0.49    | 0.63[0-4]                          | 0.67[0-2]             | 0.896   |
| TGF- $\beta$ 1 | 1.8[1-2]                           | 2.33[0-4]             | 0.56    | 1.75[0-4]                          | 3[2-4]                | 0.132   |
| IFN- $\gamma$  | 2[0-4]                             | 1.33[0-4]             | 0.39    | 1.5[0-4]                           | 1[0-2]                | 0.670   |
| TNF- $\alpha$  | 0.4[0-2]                           | 0.33[0-2]             | 1.00    | 0.25[0-2]                          | 0.667[0-2]            | 0.542   |
| IDO1           | 1.6[0-4]                           | 0.67[0-2]             | 0.21    | 1.25[0-4]                          | 0.67[0-2]             | 0.812   |
| STAT3          | 0[0-0]                             | 0[0-0]                | 1.00    | 0[0-0]                             | 0[0-0]                | NA      |
| PD-1           | 1.8[0-4]                           | 1.33[0-4]             | 0.61    | 2.13[0-4]                          | 0[0-0]                | 0.11    |
| PD-L1          | 0[0-0]                             | 1[0-4]                | 0.22    | 0.5[0-4]                           | 0.667[0-2]            | 0.649   |
| CTLA-4         | 1[0-4]                             | 1.16[0-4]             | 0.62    | 0.75[0-4]                          | 0.667[0-2]            | 0.123   |
| BRAF status    | 2/6                                | 3/7                   | 1       | 3/9                                | 2/2                   | 1       |

**Supplementary Table 3.** Correlation of tissue immunity markers before treatment with the overall clinical response and local cutaneous response. *CR*, complete regression; *PR*, partial regression; *SD*, stable disease; *P*, progression; *IL*, interleukin; *IFN- $\gamma$* , interferon-gamma; *TNF- $\alpha$* , tumor necrosis factor-alpha; *IDO*, indoleamine dioxygenase; *CD*, cluster of differentiation; *CTLA-4*, Cytotoxic T-Lymphocyte Antigen 4; *TGF- $\beta$* , Transforming growth factor beta; *MAGE*, Melanoma-associated antigen; *NY-ESO-1*, New-York Esophageal Squamous Cell Carcinoma.

| Patient code | Check point | CD8 | CD4 | Foxp3 | gp100 | Melan-A | Tyrosinase | MAGE | NY-ESO-1 | IL-10 | TGF-b | IFN-γ | TNF-a | IDO1 | STAT3 | PD-1 | PD-L1 | CTLA-4 | Overall clinical response | Local cutaneous response |
|--------------|-------------|-----|-----|-------|-------|---------|------------|------|----------|-------|-------|-------|-------|------|-------|------|-------|--------|---------------------------|--------------------------|
| 5 A-C        | T0          | 1   | 1   | 0     | 3     | 1       | 1          | 1    | 0        | 0     | 2     | 2     | 2     | 0    | 0     | 4    | 0     | 4      | CR                        | CR                       |
|              | M3          | 2   | 1   | 0     | 4     | 1       | 0          | 0    | 0        | 0     | 3     | 2     | 2     | 0    | 0     | 4    | 0     | 1      |                           |                          |
| 6 O-A        | T0          | 2   | 3   | 0     | 1     | 1       | 0          | 1    | 1        | 0     | 1     | 1     | 0     | 0    | 0     | 4    | 0     | 1      | P                         | SD                       |
|              | M3          | 2   | 1   | 0     | 0     | 0       | 0          | 0    | 0        | 1     | 0     | 2     | 0     | 0    | 0     | 2    | 0     | 4      |                           |                          |
| 7 G-M        | T0          | 1   | 1   | 0     | 2     | 3       | 0          | 0    | 0        | 1     | 2     | 0     | 0     | 4    | 0     | 4    | 0     | 0      | PR                        | CR                       |
|              | M3          | 2   | 1   | 1     | 1     | 4       | 0          | 1    | 0        | 0     | 3     | 2     | 0     | 0    | 1     | 0    | 0     | 3      |                           |                          |
| 15 T-J       | T0          | 1   | 2   | 0     | 4     | 0       | 0          | 2    | 1        | 0     | 4     | 1     | 0     | 2    | 0     | 4    | 4     | 0      | P                         | PR                       |
|              | M3          | 2   | 3   | 0     | 4     | 4       | 4          | 4    | 4        | 0     | 0     | 4     | 0     | 1    | 0     | 1    | 0     | 4      |                           |                          |

**Supplementary Table 4.** Immunohistochemistry of cutaneous immunity markers and melanoma antigens performed on 4 cutaneous biopsies taken from 4 patients before and 3 months after treatment initiation in injected lesions.
